# Supplementary material
Source: PubMed Central journal article supplement (PMC3412019)
Supplement: 1209014109_pnas.201209014SI.pdf [file 1209014109_pnas.201209014SI.pdf]

# Supporting Information

Chu et al. 10.1073/pnas.1209014109

**Table S1. Abundance of membrane/cytoskeletal peptides from trypsin-treated ghosts detected by liquid chromatography–tandem mass spectroscopy**

| Protein                                                       | Sequence coverage, % | Unique peptides | Total peptides |
|---------------------------------------------------------------|----------------------|-----------------|----------------|
| Spectrin $\alpha$                                             | 34.6                 | 100             | 306            |
| Spectrin $\beta$                                              | 29.4                 | 82              | 242            |
| Ankyrin                                                       | 32.5                 | 67              | 232            |
| Band 3                                                        | 24.3                 | 34              | 116            |
| Protein 4.1                                                   | 31.1                 | 27              | 97             |
| Protein 4.2                                                   | 24.7                 | 18              | 63             |
| Dematin                                                       | 30.9                 | 19              | 56             |
| $\alpha$ -adducin                                             | 19.9                 | 15              | 52             |
| $\beta$ -adducin                                              | 18.6                 | 22              | 41             |
| Actin                                                         | 34.8                 | 14              | 35             |
| Stomatin                                                      | 27.4                 | 11              | 31             |
| Glycophorin A                                                 | 36.5                 | 8               | 25             |
| Flotillin-2                                                   | 20.3                 | 8               | 21             |
| Palmitoylated membrane protein 1                              | 14.2                 | 7               | 20             |
| FCER1G high-affinity Ig $\epsilon$ receptor                   | 10.5                 | 2               | 18             |
| Glucose transporter member 1                                  | 12                   | 7               | 18             |
| Elongation factor 1- $\alpha$ 1                               | 7.1                  | 3               | 16             |
| Tropomyosin                                                   | 28.9                 | 7               | 15             |
| Flotillin-1                                                   | 25.3                 | 4               | 13             |
| IGKC putative uncharacterized protein                         | 13.8                 | 2               | 10             |
| CD47                                                          | 5.8                  | 2               | 8              |
| SLC14A1 solute carrier family 14 (urea transporter), member 1 | 5.8                  | 3               | 7              |
| FAM38A protein FAM38A                                         | 1.9                  | 3               | 7              |
| Ubiquitin-protein ligase UBR4                                 | 0.4                  | 3               | 6              |
| SLC43A2 large neutral amino acids transporter                 | 4.6                  | 2               | 6              |
| Tropomodulin-1                                                | 8.9                  | 3               | 6              |
| Glyceraldehyde 3-phosphate dehydrogenase                      | 8.9                  | 2               | 6              |
| CD44 antigen                                                  | 2.5                  | 2               | 5              |
| Membrane transport protein XK                                 | 3.8                  | 2               | 4              |

Sequence coverage refers to the percentage of the residues in the protein sequence that have been identified. Unique peptide is the number of unique identified tryptic peptides, and total peptide is the number of peptide spectra identified for a given protein. Only proteins with two or more identified unique peptides are listed here.
